# Supplementary material
Source: PubMed Central journal article supplement (PMC7160283)
Supplement: advancesADV2019001304-suppl1.pdf [file advancesADV2019001304-suppl1.pdf]

## SUPPLEMENTAL DATA

| <b>Supplemental Table 1. JULIET CRS Management Algorithm</b>                                                                                                                                                                                                                                                                                                                                                                                                                                                                                                            |
|-------------------------------------------------------------------------------------------------------------------------------------------------------------------------------------------------------------------------------------------------------------------------------------------------------------------------------------------------------------------------------------------------------------------------------------------------------------------------------------------------------------------------------------------------------------------------|
| <b>Pretreatment</b>                                                                                                                                                                                                                                                                                                                                                                                                                                                                                                                                                     |
| Acetaminophen/paracetamol and diphenhydramine/H1 antihistamine<br>Prophylaxis for complications of TLS as appropriate                                                                                                                                                                                                                                                                                                                                                                                                                                                   |
| <b>Tisagenlecleucel infusion</b>                                                                                                                                                                                                                                                                                                                                                                                                                                                                                                                                        |
| <b>Prodromal syndrome:</b> low-grade fevers, fatigue, anorexia (hours to days)                                                                                                                                                                                                                                                                                                                                                                                                                                                                                          |
| Observation, rule out infection (surveillance cultures)<br>Antibiotics per local guidelines (febrile neutropenia)<br>Symptomatic support                                                                                                                                                                                                                                                                                                                                                                                                                                |
| <b>Symptom progression:</b> High fevers, hypoxia, mild hypotension<br><b>1st-Line Management:</b><br>Oxygen, fluids, low-dose vasopressor support, antipyretics<br>Monitor/manage complications of TLS                                                                                                                                                                                                                                                                                                                                                                  |
| <b>Further symptom progression:</b>                                                                                                                                                                                                                                                                                                                                                                                                                                                                                                                                     |
| <ul style="list-style-type: none"> <li>• Hemodynamic instability despite IV fluids and moderate- to high-dose vasopressor support</li> </ul> <b>OR</b> <ul style="list-style-type: none"> <li>• Worsening respiratory distress, including pulmonary infiltrates increasing oxygen requirement including high-flow O<sub>2</sub> and/or need for mechanical ventilation</li> </ul> <b>OR</b> <ul style="list-style-type: none"> <li>• Rapid clinical deterioration</li> </ul>                                                                                            |
| <b>2nd-Line Management:</b>                                                                                                                                                                                                                                                                                                                                                                                                                                                                                                                                             |
| <b>Tocilizumab: IV infusion over 1 hour</b>                                                                                                                                                                                                                                                                                                                                                                                                                                                                                                                             |
| <ul style="list-style-type: none"> <li>• Patient weight &lt;30 kg: 12 mg/kg IV</li> <li>• Patient weight ≥30 kg: 8 mg/kg IV (max dose 800 mg)</li> </ul> Hemodynamic and respiratory support                                                                                                                                                                                                                                                                                                                                                                            |
| <b>Lack of clinical improvement while awaiting tocilizumab response</b>                                                                                                                                                                                                                                                                                                                                                                                                                                                                                                 |
| <b>3rd-Line Management:</b>                                                                                                                                                                                                                                                                                                                                                                                                                                                                                                                                             |
| Consider other diagnosis causing clinical deterioration (ie, sepsis, adrenal insufficiency)<br>If no improvement within 1st dose of tocilizumab within 12 to 18 hours, consider steroids (plan rapid taper after hemodynamic normalization):<br>2 mg/kg methylprednisolone as an initial dose, then 2 mg/kg per day. As steroids are tapered quickly, monitor for adrenal insufficiency and need for hydrocortisone replacement<br>If no response to steroids within 24 hours, consider 2nd dose of tocilizumab (dosed as above)<br>Hemodynamic and respiratory support |
| <b>Lack of clinical improvement while awaiting response to 3rd-line management</b>                                                                                                                                                                                                                                                                                                                                                                                                                                                                                      |
| <b>4th-Line Management:</b>                                                                                                                                                                                                                                                                                                                                                                                                                                                                                                                                             |
| Consider other diagnosis causing clinical deterioration (ie, sepsis, adrenal insufficiency)<br>If no response to steroids and 2nd dose of tocilizumab within 24 hours or further clinical deterioration, consider siltuximab 11 mg/kg IV over 1 hour (if available in country).<br>Hemodynamic and respiratory support                                                                                                                                                                                                                                                  |
| <b>Lack of clinical improvement while awaiting response to 4th-line management</b>                                                                                                                                                                                                                                                                                                                                                                                                                                                                                      |
| <b>5th-Line Management:</b>                                                                                                                                                                                                                                                                                                                                                                                                                                                                                                                                             |
| Consider other diagnosis causing clinical deterioration (ie, sepsis, adrenal insufficiency)<br>In ongoing CRS despite prior therapy, consider anti-T cell therapies such as cyclophosphamide, anti-thymocyte globulin, or alemtuzumab<br>Hemodynamic and respiratory support                                                                                                                                                                                                                                                                                            |

CRS, cytokine release syndrome; IV, intravenous; TLS, tumor lysis syndrome.  
Novartis data on file.

| <b>Supplemental Table 2. ZUMA-1 CRS Management Algorithm</b>                                                                                                                                                                                                   |                                                         |                                                                                                                                                                                                                                                                                                                               |
|----------------------------------------------------------------------------------------------------------------------------------------------------------------------------------------------------------------------------------------------------------------|---------------------------------------------------------|-------------------------------------------------------------------------------------------------------------------------------------------------------------------------------------------------------------------------------------------------------------------------------------------------------------------------------|
| <b>CRS Grading Assessment</b>                                                                                                                                                                                                                                  | <b>Extensive Comorbidities or Older Age?<br/>No/Yes</b> | <b>Treatment</b>                                                                                                                                                                                                                                                                                                              |
| <b>Grade 1:</b> <ul style="list-style-type: none"> <li>Fever (defined as <math>\geq 38.3^{\circ}\text{C}</math>)</li> <li>Constitutional symptoms</li> </ul>                                                                                                   | N/A                                                     | <ul style="list-style-type: none"> <li>Vigilant supportive care</li> <li>Assess for infection</li> <li>Treat fever and neutropenia if present, monitor fluid balance, antipyretics, and analgesics as needed</li> </ul>                                                                                                       |
| <b>Grade 2:</b> <ul style="list-style-type: none"> <li>Hypotension: responds to fluids or one low-dose vasopressor</li> <li>Hypoxia: responds to <math>&lt;40\% \text{O}_2</math></li> <li>Organ toxicity: grade 2</li> </ul>                                  | No                                                      | <ul style="list-style-type: none"> <li>As above for grade 1</li> <li>Monitor organ function closely</li> <li>Monitor with continuous cardiac telemetry and pulse oximetry</li> </ul>                                                                                                                                          |
| <b>Grade 2:</b> <ul style="list-style-type: none"> <li>Hypotension: responds to fluids or one low-dose vasopressor</li> <li>Hypoxia: responds to <math>&lt;40\% \text{O}_2</math></li> <li>Organ toxicity: grade 2</li> </ul>                                  | Yes                                                     | <ul style="list-style-type: none"> <li>Consider tocilizumab (8 mg/kg IV over 1 hour, not to exceed 800 mg) <math>\pm</math> corticosteroids (eg, methylprednisolone 1 mg/kg BID or dexamethasone 10 mg every 6 hours)</li> </ul>                                                                                              |
| <b>Grade 3:</b> <ul style="list-style-type: none"> <li>Hypotension: requires multiple vasopressors or high-dose vasopressors</li> <li>Hypoxia: requires <math>\geq 40\% \text{O}_2</math></li> <li>Organ toxicity: grade 3 or grade 4 transaminitis</li> </ul> | N/A                                                     |                                                                                                                                                                                                                                                                                                                               |
| <b>Grade 4</b> <ul style="list-style-type: none"> <li>Mechanical ventilation</li> <li>Organ toxicity: grade 4 excluding transaminitis</li> </ul>                                                                                                               | N/A                                                     | <ul style="list-style-type: none"> <li>As above for grade 2/3</li> <li>Corticosteroids (eg, methylprednisolone 1 g/day <math>\times</math> 3, followed by a rapid taper consisting of 250 mg BID <math>\times</math> 2 days, 125 mg BID <math>\times</math> 2 days, and then 60 mg BID <math>\times</math> 2 days)</li> </ul> |

BID, twice daily; CRS, cytokine release syndrome; IV, intravenous; N/A, not applicable.

Reprinted from Neelapu SS, et al. Axicabtagene ciloleucel CAR T-cell therapy in refractory large B-cell lymphoma. N Engl J Med 377:2531-2544, 2017. Copyright © 2017 Massachusetts Medical Society. Reprinted with permission from Massachusetts Medical Society.
